# Supplementary material
Source: MDPI journal article supplement (https://www.mdpi.com/2073-4441/15/16/2889)
Supplement: s1 [file s1 › water-2509779-supplementary.pdf]

## Supplementary material

**Table S1.** Municipal Solid Waste production and recycling data in Kazakhstan (data in kt/year)

| Region            | 2018   |           | 2019   |           | 2020      |           |
|-------------------|--------|-----------|--------|-----------|-----------|-----------|
|                   | MSW    | Recycling | MSW    | Recycling | MSW       | Recycling |
| Kazakhstan        | 4319.2 | 497.1     | 4736.6 | 705.2     | 4,551,755 | 868,983   |
| Akmola region     | 241.0  | 7.1       | 245.0  | 7.4       | 243,000   | 37,555    |
| Aktobe            | 298.6  | 34.9      | 295.6  | 29.6      | 305,700   | 30,591    |
| Almaty            | 628.7  | 170.1     | 624.3  | 145.4     | 600,000   | 102,000   |
| Atyrau            | 207.8  | 3.5       | 191.7  | 20.0      | 233,642   | 45,680    |
| East Kazakhstan   | 108.1  | 5.7       | 107.0  | 9.2       | 107,000   | 12,031    |
| Zhambyl           | 95.7   | 3.0       | 80.9   | 6.9       | 76,550    | 9,688     |
| Karaganda         | 651.3  | 106.8     | 660.0  | 115.0     | 655,000   | 190,000   |
| Kostanay          | 250.0  | 24.1      | 216.7  | 22.3      | 229,802   | 27,410    |
| Kyzylorda         | 147.0  | 10.9      | 122.0  | 13.1      | 117,000   | 21,000    |
| Manghystau        | 182.3  | 2.6       | 188.3  | 63.6      | 110,520   | 39,013    |
| Pavlodar          | 117.3  | 0.1       | 648.0  | 97.2      | 647,000   | 142,340   |
| North Kazakhstan  | 66.1   | 5.0       | 74.7   | 7.6       | 86,539    | 11,290    |
| Türkistan         | 138.0  | 9.9       | 128.1  | 12.9      | 122,771   | 15,962    |
| Shygys Kazakhstan | 183.6  | 8.9       | 164.7  | 5.4       | 171,576   | 30,873    |
| Astana            | 307.6  | 37.7      | 318.6  | 50.7      | 198,601   | 59,085    |
| Almaty            | 480.0  | 27.4      | 456.0  | 50.0      | 438,000   | 42,000    |
| Almaty            | 216.2  | 39.5      | 215.1  | 49.0      | 209,054   | 52,465    |

**Table S2** - Component composition of municipal solid waste to landfills, 2020 (data in kt/year)

| <b>MSW component</b>                                                | <b>Kazakhstan</b> | <b>(%)</b> | <b>Akmola region</b> | <b>(%)</b> |
|---------------------------------------------------------------------|-------------------|------------|----------------------|------------|
| Food waste                                                          | 18,166            | 1.63       | *                    | -          |
| Waste paper, cardboard and paper waste                              | 111,968           | 10.04      | 1,637                | 14.67      |
| Glass waste                                                         | 83,051            | 7.44       | 497                  | 4.45       |
| Plastic, plastic, polyethylene and polyethylene terephthalate waste | 136,632           | 12.26      | 145                  | 1.30       |
| Electronic and electrical equipment                                 | 710               | 0.07       | -                    | -          |
| Non ferrous and non-ferrous scrap metal                             | 34,923            | 3.15       | 395                  | 3.54       |
| Tyres                                                               | 1889              | 0.17       | -                    | -          |
| Wood, leaves                                                        | 16,513            | 1.48       | 685                  | 6.14       |
| Clothing, textiles                                                  | 5890              | 0.53       | -                    | -          |
| Other waste                                                         | 705,055           | 63.24      | 7801                 | 69.9       |
| Total                                                               | 1,114,797         | 100        | 11,160               | 100        |

\* - no available data

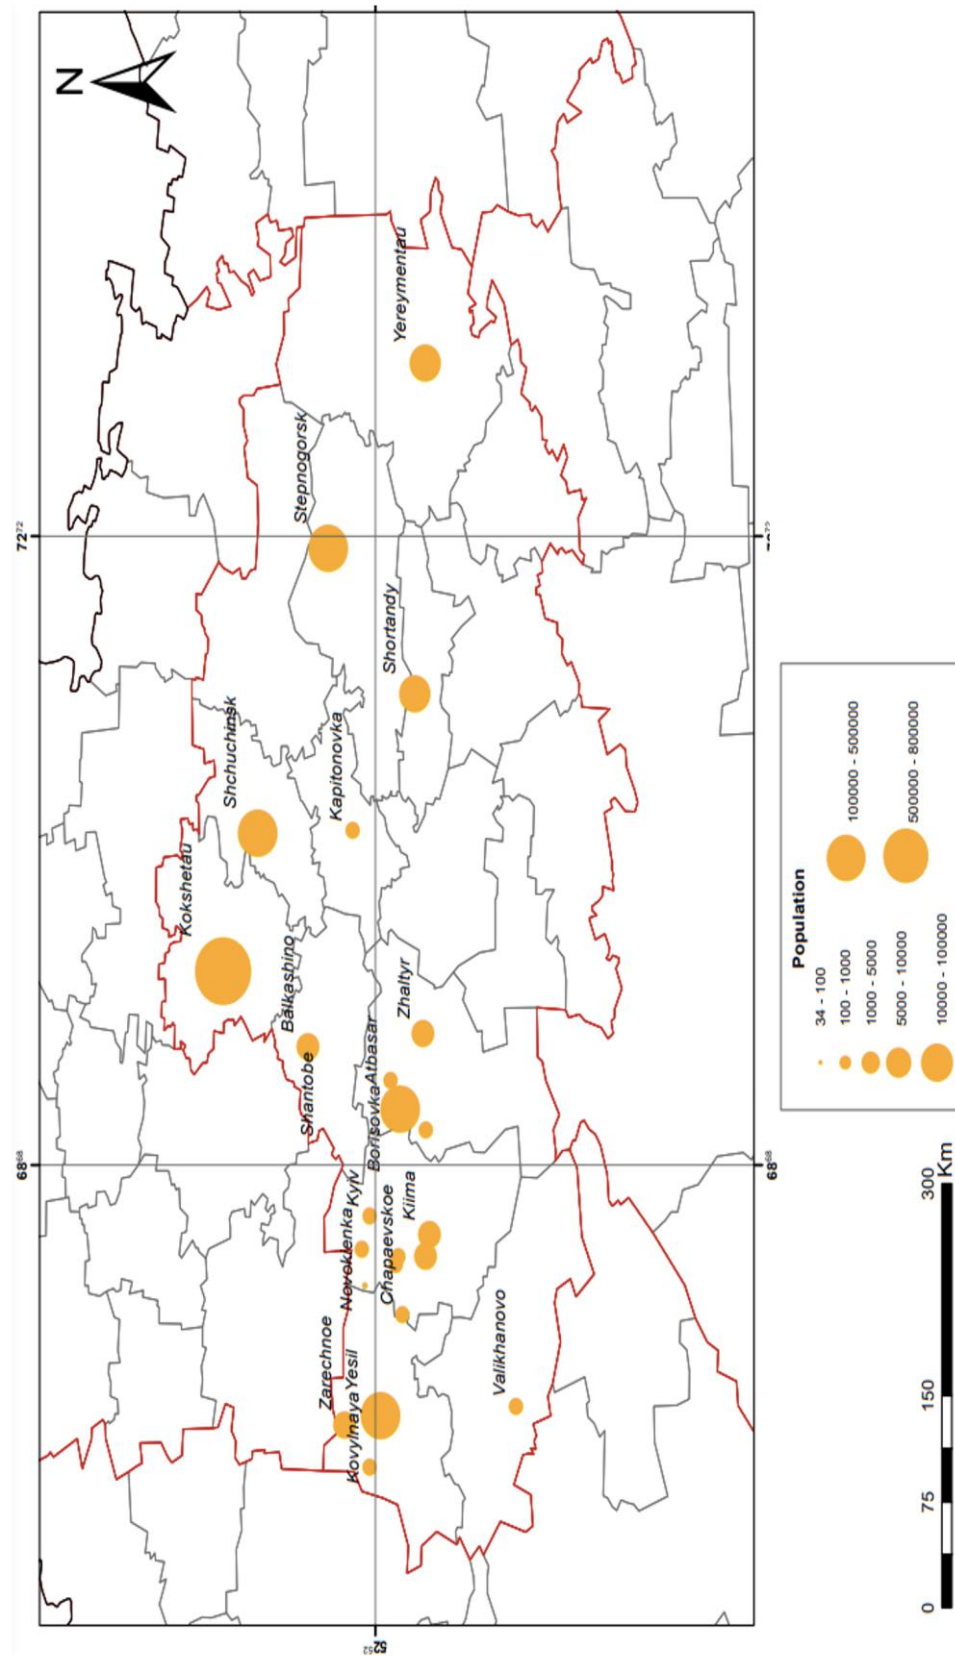

**Figure S1.** Location of the 24 landfills of the Akmola region and associated population

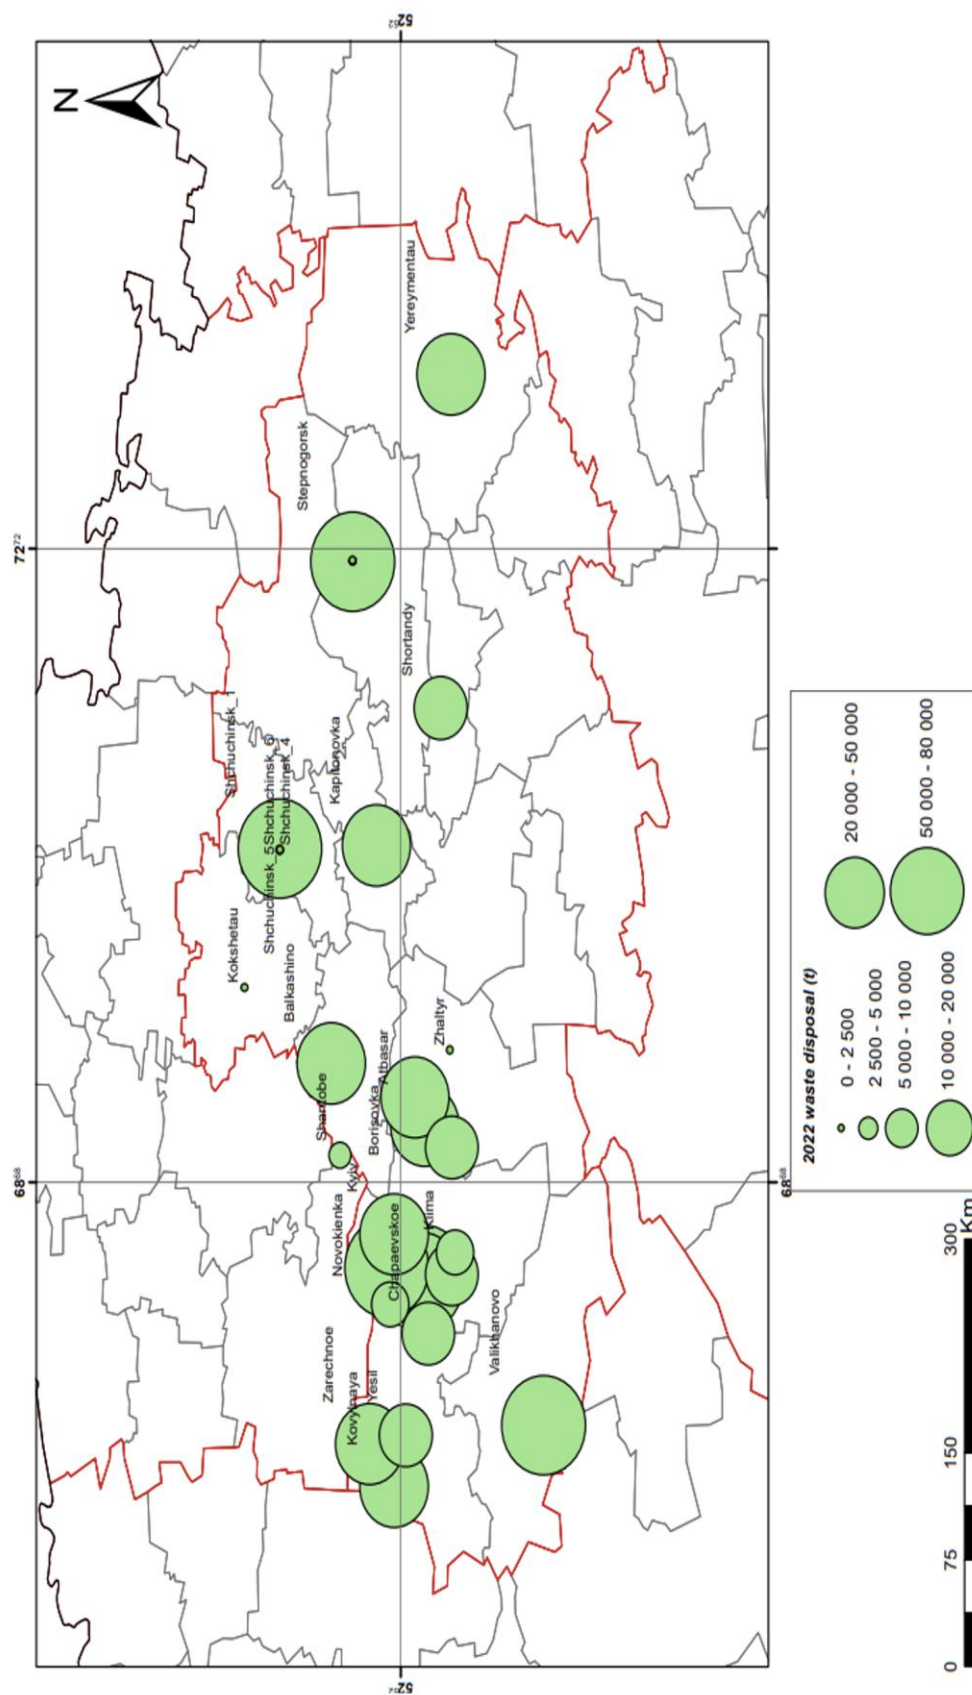

**Figure S2.** Annual disposal of waste in each landfill in 2022 (data in t)

**Table S3 - Location of landfills in Akmola region and socio-economic characteristics of the regions**

| Nº | District            | Landfill location    | Population<br>Nov 1 <sup>st</sup> 2022 | Economic activity                                                                                                                                                                                                  |
|----|---------------------|----------------------|----------------------------------------|--------------------------------------------------------------------------------------------------------------------------------------------------------------------------------------------------------------------|
| 1  | -                   | Stepnogorsk          | 45,919                                 | Mining: gold mining, uranium mining. Production of sulfuric acid                                                                                                                                                   |
| 2  | Burabay             | Shchuchinsk          | 46,807                                 | Factories: glass, non-metallic building materials, reinforced concrete, dairy, meat processing plant, clothing factory. The Borovoe resort is located 20km to the north-east.                                      |
| 3  | Zharkai district    | Valikhanovo          | 749                                    | Large grain area, 99.2% of the crops were cereals and leguminous crops                                                                                                                                             |
| 4  | Atbasar district    | Atbasar              | 28,753                                 | Railway junction, agricultural raw material processing center, flour production, bakery products.                                                                                                                  |
| 5  |                     | Oktyabrskoye         | 792                                    |                                                                                                                                                                                                                    |
| 6  |                     | Borisovka village    | 920                                    |                                                                                                                                                                                                                    |
| 7  | Zhaksyn district    | Chapaevskoye         | 311                                    | Agrobusiness and agriculture: agricultural production, processing and distribution to consumers                                                                                                                    |
| 8  |                     | Belagash             | 942                                    |                                                                                                                                                                                                                    |
| 9  |                     | Kievskoe             | 535                                    |                                                                                                                                                                                                                    |
| 10 |                     | Novokienka           | 652                                    |                                                                                                                                                                                                                    |
| 11 |                     | Kiima                | 2659                                   |                                                                                                                                                                                                                    |
| 12 |                     | Kirovske             | 34                                     |                                                                                                                                                                                                                    |
| 13 |                     | Podgornoe            | 657                                    |                                                                                                                                                                                                                    |
| 14 |                     | Zaporizhzhya village | 1899                                   |                                                                                                                                                                                                                    |
| 15 | Yesil district      | Zarechnoye           | 1220                                   | Cultivation and sale of agricultural products, production of mixed fodder                                                                                                                                          |
| 16 |                     | Kovt. Kovyl'naya     | 523                                    |                                                                                                                                                                                                                    |
| 17 |                     | Esil                 | 10,545                                 |                                                                                                                                                                                                                    |
| 18 | Ereimentau district | Ereymtau             | 9130                                   | Grain farming and animal husbandry (cattle, sheep, pigs, horses).<br>Gold deposits Bestobe and Eshkolmes are being developed.<br>Plants: crushed stone, reinforced concrete products, butter and bakery and others |
| 19 | Sandykktau          | Shantobe             | 3543                                   | Cultivation of fruit and berry products.<br>Mothballed uranium mines                                                                                                                                               |
| 20 | Shortanda district  | Shortandy            | 6711                                   | A polyethylene products manufacturing plant. Mining and processing facilities.<br>Flour milling, agrarian, agricultural facilities. Facilities for the production of construction products                         |
| 21 | Astrakhan district  | Zhaltyr Phase 1      | 4241                                   | Livestock and crop production. Production of construction materials and furniture, maintenance of agricultural machinery. There are facilities for meat, dairy and flour industry                                  |
| 22 |                     | Zhaltyr Phase 2      |                                        |                                                                                                                                                                                                                    |
| 23 | Bulandinsky         | Kapitonovka          | 932                                    | Cultivation of cereals, pulses, oilseeds and breeding of various animal breeds.<br>Production of iron, sand, crushed stone, autoclaved gas blocks, wooden sleepers, rubber products                                |
| 24 | Sandykktau district | Balkashino           | 4813                                   | Agricultural grain production, grain products, meat industry, sunflower oil production                                                                                                                             |

**Table S4 - Statistical data on licensed landfills in the Akmola region**

| Nº | District           | Population centre    | Operation period                     | Site area (m²) | Total waste capacity in the period (t) | Waste disposed in 2022 (t) | Location                                                                                                                                                                                                              | Air pollutant emissions, (t/year) |
|----|--------------------|----------------------|--------------------------------------|----------------|----------------------------------------|----------------------------|-----------------------------------------------------------------------------------------------------------------------------------------------------------------------------------------------------------------------|-----------------------------------|
| 1  | -                  | Stepnogorsk          | 2019-2028                            | 203,356        | 121,000                                | 56,350                     | 1.0 km from residential area. 5 km to the Aksu River                                                                                                                                                                  | 7765 / 862.8                      |
| 2  | Burabay            | Shchuchinsk          | closed in 2014 but still operational | 54,000         | 500,000                                | 76,370                     | 2 km from the city border                                                                                                                                                                                             | No data available                 |
| 3  | Zharkai district   | Valikhanovo          | 2018-2027                            | 100,000        | 130,780                                | 63,640                     | 0.8 km from a residential area                                                                                                                                                                                        | 179.63 / 18.36                    |
| 4  | Atbasar district   | Atbasar              | 2010-2020                            | 100,000        | 453,788                                | 38,615                     | 1.1 km from a residential area                                                                                                                                                                                        | No data available                 |
| 5  |                    | Oktyabrskoye         | 2019-2026                            | 100,000        | 42,718                                 | 19,218                     | 1.1 km from a residential area                                                                                                                                                                                        | 65.5228 / 8.19                    |
| 6  |                    | Borisovka village    | 2016-2025                            | 60,000         | 30,333                                 | 21,083                     | 1.4 km from a residential area                                                                                                                                                                                        | 1187.155 / 118.7                  |
| 7  | Zhaksyn district   | Chapaevskoye         | 2019-2028                            | 60,000         | 30,331                                 | 10,771                     | 2 km from residential area                                                                                                                                                                                            | 44.36/ 4.78                       |
| 8  |                    | Belagash             | 2019-2028                            | 60,000         | 192,780                                | 72,123                     | 1.15 km from a residential area                                                                                                                                                                                       | 125.15/ 13.49                     |
| 9  |                    | Kievskoe             | 2019-2028                            | 60,000         | 69,329                                 | 24,725                     | 1.6 km from a residential area<br>2.3 km from river                                                                                                                                                                   | 134.46 / 14.42                    |
| 10 |                    | Novokienka           | 2019-2028                            | 90,000         | 164,714                                | 58,556                     | 1.15 km from a residential area                                                                                                                                                                                       | 252.46/ 27.12                     |
| 11 |                    | Kiima                | 2019-2028                            | 60,000         | 22,808                                 | 8108                       | 1.3 km from a residential area                                                                                                                                                                                        | 98.86 / 10.6                      |
| 12 |                    | Kirovskoe            | 2019-2026                            | 60,000         | 13,086                                 | 5,887                      | 1.5 km from residential area<br>1.5 km from the Kumai River                                                                                                                                                           | 12.67/ 7.52                       |
| 13 |                    | Podgornoe            | 2019-2028                            | 90,000         | 214,778                                | 76,598                     | 1.25 km from residential area<br>143 km to the Ak15kairakty river16                                                                                                                                                   | 114.40/ 12.27                     |
| 14 |                    | Zaporizhzhya village | 2020-2024                            | 100,000        | 28,081                                 | 16,067                     | 0.5 km 17from a residential18l area                                                                                                                                                                                   | 182/ 36.4                         |
| 15 | Yesilskiy district | Zarechnoye           | 2016-2025                            | 43,000         | 46,572                                 | 32,600                     | 1500 metres in the north direction from Zarechnoye village and 700 metres in the north-west direction from Dalneye village.<br>North of the village of Zarechnoye and 700 metres north-west of the village of Dalneye | 734.8/ 73.48                      |

|    |                      |                 |           |         |         |        |                                                           |                   |
|----|----------------------|-----------------|-----------|---------|---------|--------|-----------------------------------------------------------|-------------------|
| 16 |                      | Kovt. Kovylnaya | 2019-2023 | 45,000  | 60,780  | 48,624 | 1.0 km from residential area. 4 km to the Janyspai River. | 30.44/ 6.09       |
| 17 |                      | Esil            | 2021-2030 | 70,000  | 108,951 | 18,391 | 1.4 km from the city border                               | -                 |
| 18 | Ereimentau district  | Ereimentau      | 2019-2028 | 70,000  | 101,814 | 40,134 | 0.5 km from a residential area                            | 1362.51/ 113.79   |
| 19 | Sandykktau           | Shantobe        | 2019-2028 | 30,000  | 7181.6  | 2609   | 1.4 km from a residential area                            | 1362.9/ 126.8     |
| 20 | Shortanda            | Shortandy       | 2019-2028 | 100,000 | 30,380  | 11,476 | 3.2 km from the city border                               | 817.69/ 222.16    |
| 21 | Astrakhan district   | Zhaltyr         | 2017-2021 | 100,000 | 91,637  | 69,897 | 2.2 km from residential area                              | 311.93 / 62.4     |
| 22 |                      | Zhaltyr         | 2021-2030 | 100,000 | 144,662 | 22,984 | 2 km from the Boksuk River                                | 231.46/ 24.11     |
| 23 | Bulandinsky district | Kapitonovka     | 2017-2022 | 60,000  | 50,263  | 38,118 | 1.1 km from a residential area.                           | No data available |
| 24 | Sandykktau district  | Balkashino      | 2020-2023 | 80,000  | 31,256  | 23,256 | 1.7 km from a residential area.                           | 718.05 / 179.51   |

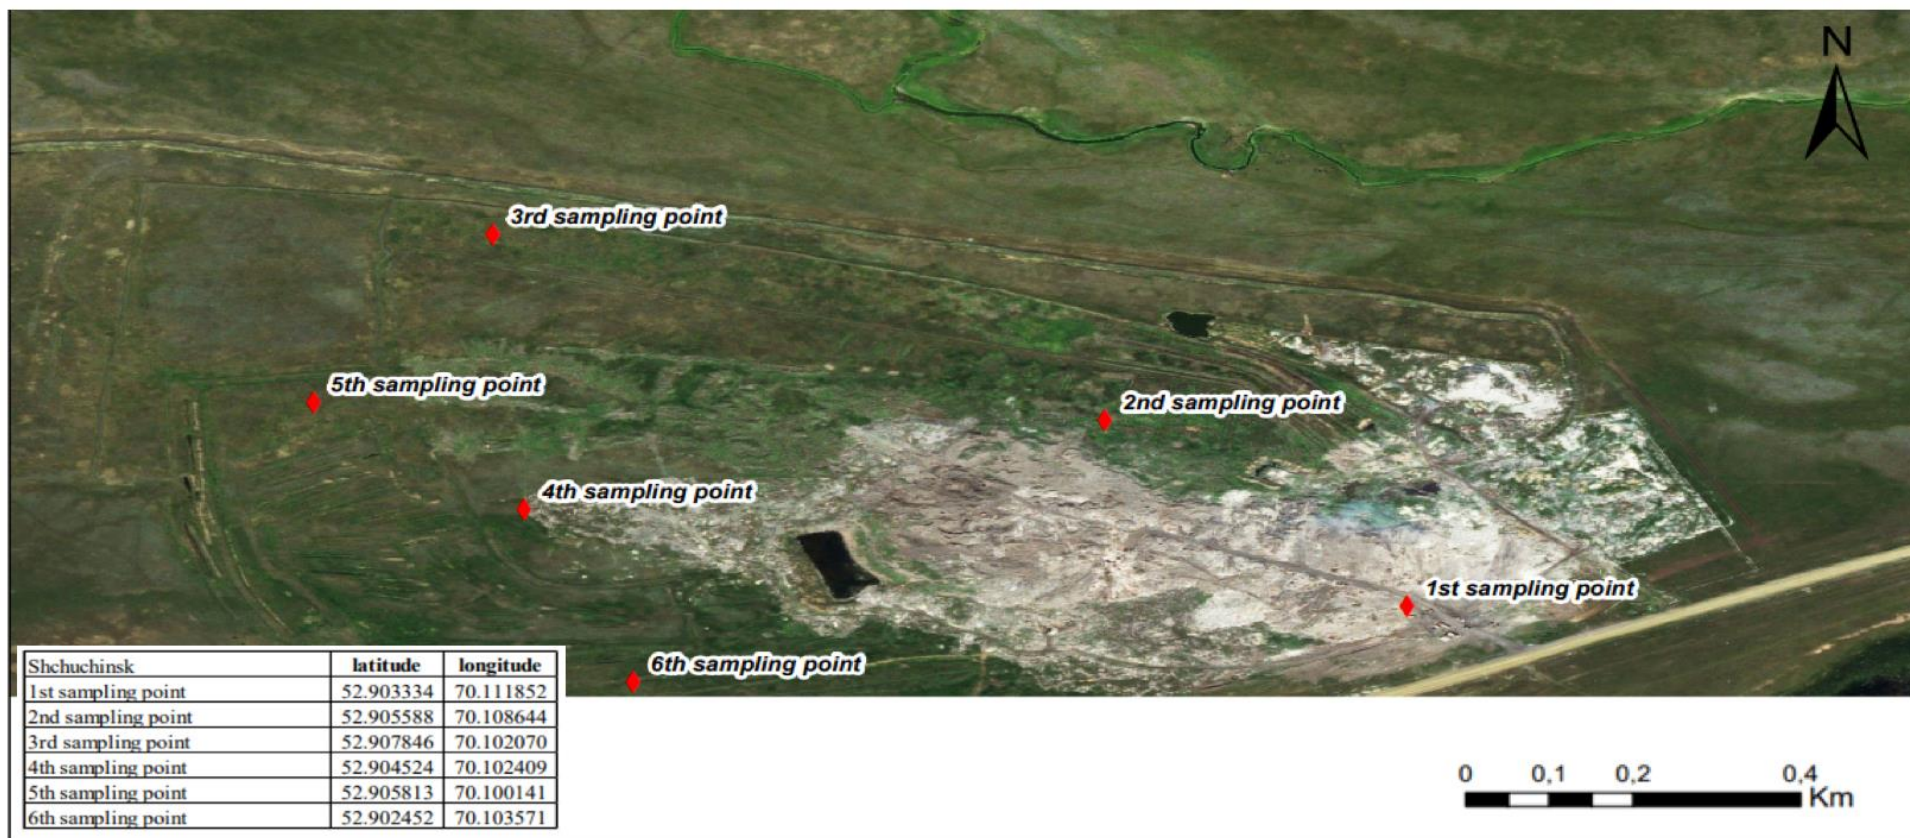

**Figure S3.-** Locations of sampling sites at the MSW landfill of Shchuchinsk

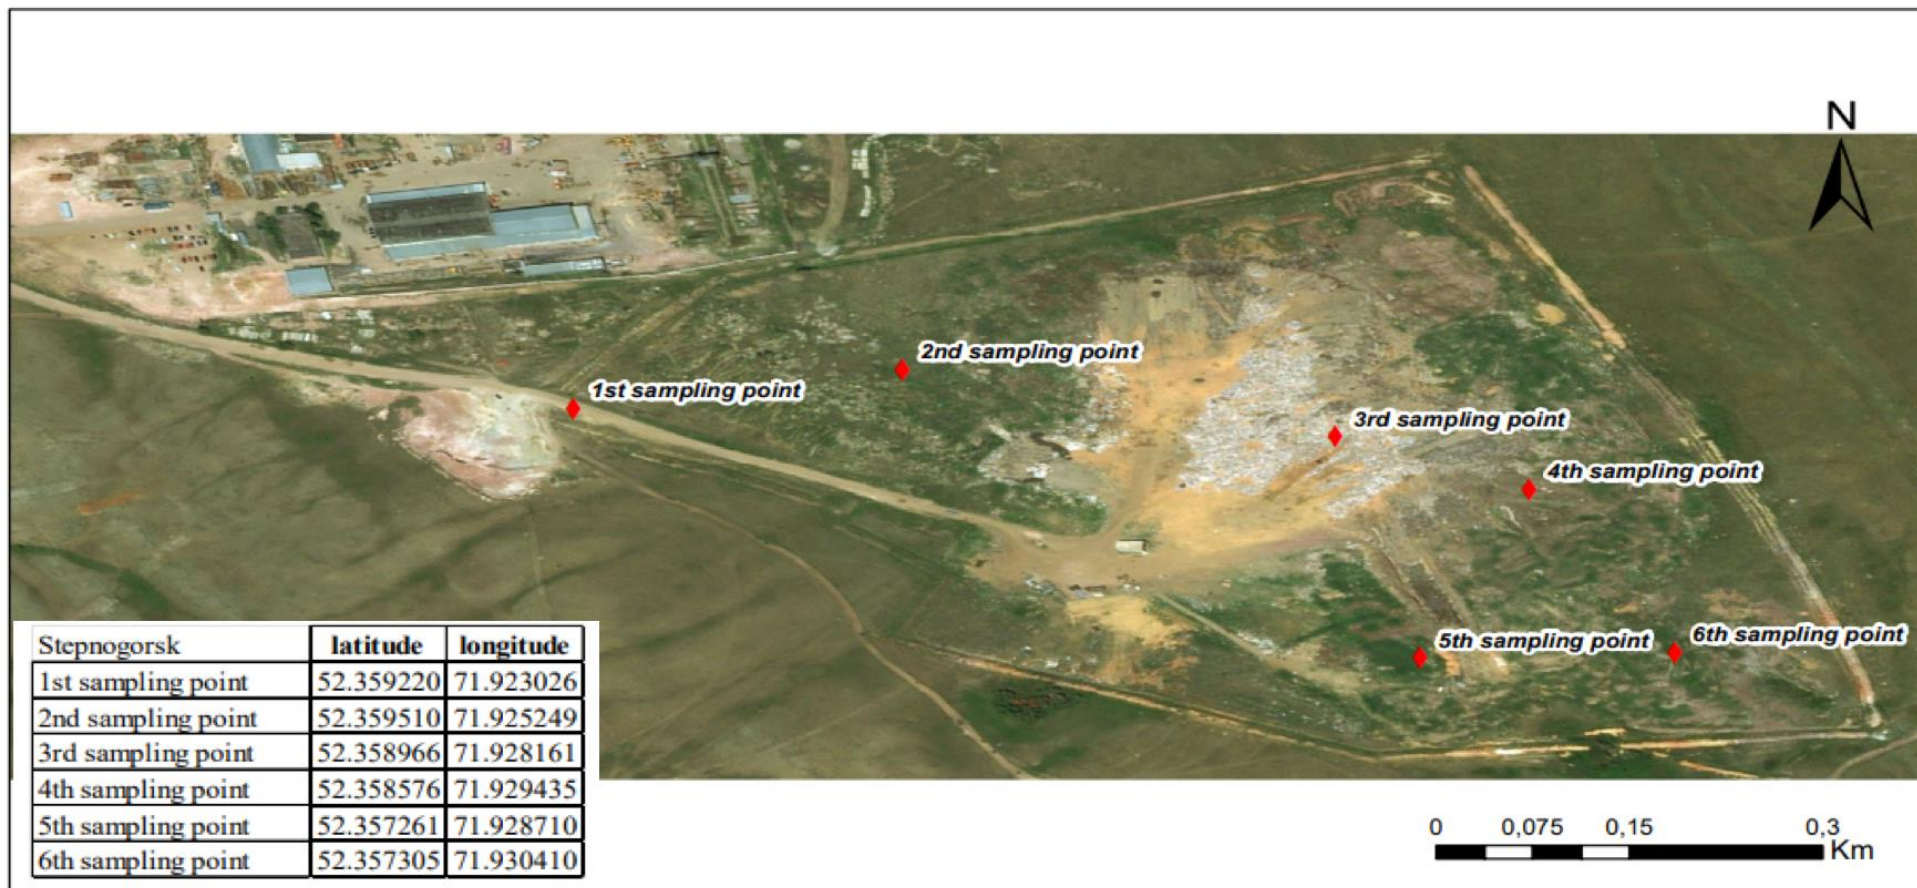

Figure S4 - Location of Sampling Sites at Stepnogorsk Landfill
